# Supplementary material for: The patient-reported outcome content of international ovarian cancer randomised controlled trial protocols
Source: Springer Nature journal article supplement (doi:10.1007/s11136-016-1339-x), 2016-06-13
Supplement: MOESM1 [file 10241388]

# Appendix 1. Search strategy

Rebecca Mercieca-Bebber, Michael Friedlander, Peey-Sei Kok, Melanie Calvert, Derek Kyte, Martin Stockler, Madeleine T. King. The patient-reported outcome content of international ovarian cancer randomised controlled trial protocols.

Medline OVID 1/2/2016

|  | **Ovarian cancer terms** |  |
| --- | --- | --- |
| 1 | (ovar* adj (neoplasm$ or cancer or carcinoma or tumo$ or malignan$)).tw. | 49275 |
| 2 | Ovarian neoplasms.sh. | 67150 |
|  | **QOL/patient-reported outcome terms** |  |
| 3 | self-report*.tw. | 87069 |
| 4 | Quality of life.sh. | 131753 |
| 5 | Quality of life.tw. | 152958 |
| 6 | "health status".tw. | 37664 |
| 7 | 'health utilit*'.tw. | 1140 |
| 8 | 'symptom assessment'.tw. | 1445 |
| 9 | physical function*.tw. | 13473 |
| 10 | social function*.tw. | 9121 |
| 11 | "social wellbeing".tw. | 134 |
| 12 | 'sexual function*'.tw. | 9161 |
| 13 | PRO.tw. | 115062 |
| 14 | PROM.tw. | 1390 |
| 15 | HRQOL.tw. | 8025 |
| 16 | HRQL.tw. | 2411 |
| 17 | QOL.tw. | 20265 |
| 18 | QL.tw. | 1078 |
| 19 | "functional status".tw. | 17166 |
| 20 | (symptom* adj (improv$ or change$ or deteriorat$ or assessment$ or burden or distress)).tw. | 15265 |
| 21 | Questionnaire*.tw. | 308065 |
| 22 | Survey.tw. | 325454 |
|  | **Trial terms** |  |
| 23 | "trial".tw. | 367927 |
| 24 | RCT.tw. | 9071 |
| 25 | randomi$ study.tw. | 23300 |
|  | **Groupings** |  |
| 26 | 1 or 2 | 75642 |
| 27 | or/3-22 | 936149 |
| 28 | 23 or 24 or 25 | 390904 |
| 29 | 26 and 27 and 28 | 349 |
| 30 | limit 29 to (english language and yr="2000 -Current") | 308 |
| 31 | 26 and 27 | 2913 |
| 32 | limit 31 to (clinical study or clinical trial, phase iii or clinical trial or controlled clinical trial) | 160 |
| 33 | limit 32 to (english language and yr="2000 -Current") | 111 |
| 34 | 30 and 33 | 66 |
| **35** | **30 or 33** | **353** |

Cochrane central register for controlled trials 1/2/2016

|  | **Searches** | **Results** |
| --- | --- | --- |
| 1 | (ovar* adj (neoplasm$ or cancer or carcinoma or tumo$ or malignan$)).tw. | 2506 |
| 2 | Ovarian neoplasms.sh. | 1053 |
| 3 | self-report*.tw. | 11240 |
| 4 | Quality of life.sh. | 12973 |
| 5 | Quality of life.tw. | 28934 |
| 6 | "health status".tw. | 2981 |
| 7 | 'health utilit*'.tw. | 220 |
| 8 | 'symptom assessment'.tw. | 286 |
| 9 | physical function*.tw. | 3362 |
| 10 | social function*.tw. | 1594 |
| 11 | "social wellbeing".tw. | 16 |
| 12 | 'sexual function*'.tw. | 1336 |
| 13 | PRO.tw. | 3578 |
| 14 | PROM.tw. | 221 |
| 15 | HRQOL.tw. | 1572 |
| 16 | HRQL.tw. | 485 |
| 17 | QOL.tw. | 5175 |
| 18 | QL.tw. | 180 |
| 19 | "functional status".tw. | 1896 |
| 20 | (symptom* adj (improv$ or change$ or deteriorat$ or assessment$ or burden or distress)).tw. | 4663 |
| 21 | Questionnaire*.tw. | 33367 |
| 22 | Survey.tw. | 8356 |
| 23 | 1 or 2 | 2681 |
| 24 | or/3-22 | 79824 |
| 25 | 23 and 24 | 278 |
| **26** | **limit 25 to (english language and yr="2000 -Current")** | **216** |
