# Supplementary material for: The patient-reported outcome content of international ovarian cancer randomised controlled trial protocols
Source: Springer Nature journal article supplement (doi:10.1007/s11136-016-1339-x), 2016-06-13
Supplement: MOESM3 [file 10683044]

**Appendix 3. PRO protocol checklist scores overtime**

Rebecca Mercieca-Bebber, Michael Friedlander, Peey-Sei Kok, Melanie Calvert, Derek Kyte, Martin Stockler, Madeleine T. King. The patient-reported outcome content of international ovarian cancer randomised controlled trial protocols.


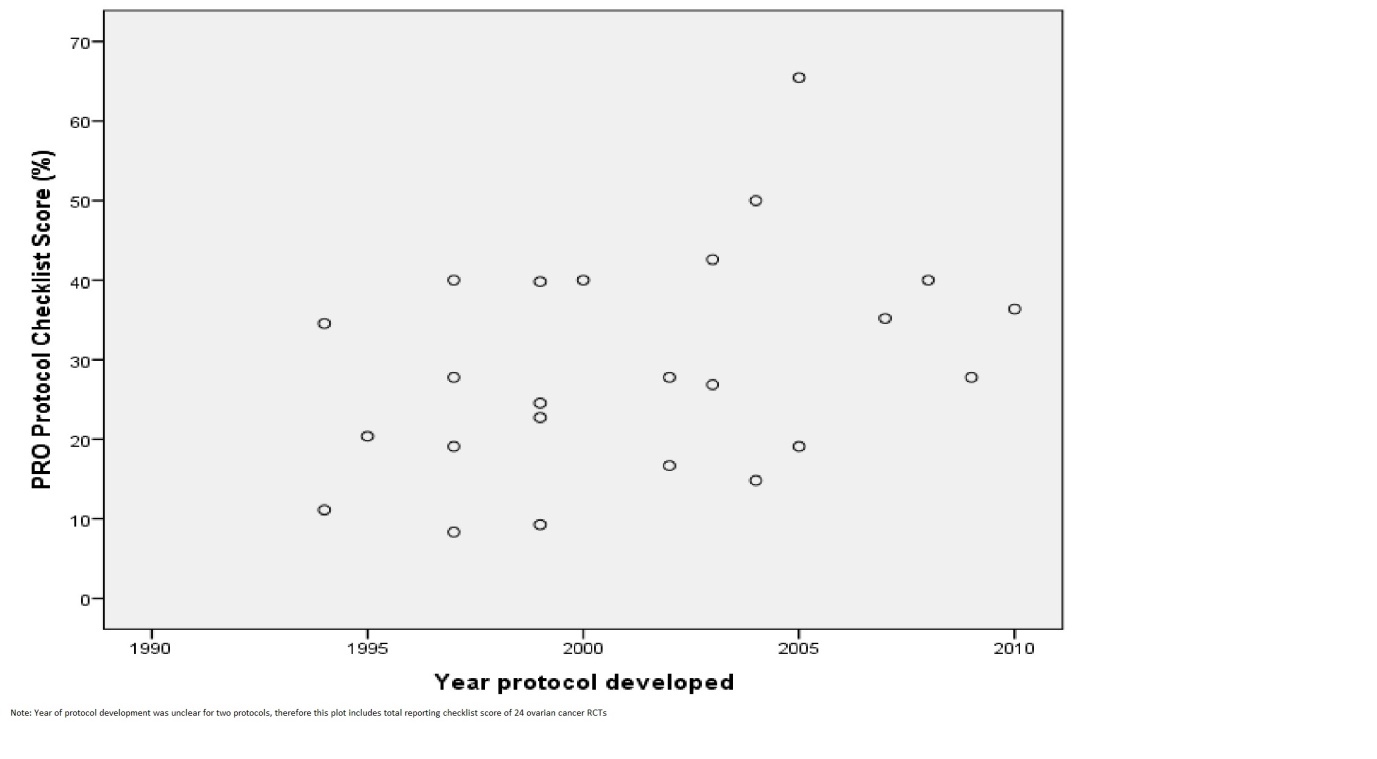


Note: year of protocol development was unclear for 2 protocols, therefore this plot includes PRO protocol checklist scores (%) for 24 ovarian cancer RCTs. There was a trend towards total PRO protocol checklist scores improving overtime, however it was not statistically significant: r =0.37, p=0.07 [95% CI -0.35, 0.68].
